# Supplementary material
Source: ML conference proceedings conference paper supplement (https://proceedings.neurips.cc/paper_files/paper/2017/hash/e702e51da2c0f5be4dd354bb3e295d37-Abstract.html)
Supplement: Supplementary file [file e702e51da2c0f5be4dd354bb3e295d37-Supplemental.zip]

# Supplementary Material for Consistent Robust Regression

## A SSC/SSS guarantees

In this section we restate some results from [3] which are required for the convergence analysis of the RLSR problem. Similar variants are known from other works, e.g. [10], as well.

**Definition 7.** A random variable  $x \in \mathbb{R}$  is called sub-Gaussian if the following quantity is finite

$$\sup_{p \geq 1} p^{-1/2} (\mathbb{E}[|x|^p])^{1/p}.$$

Moreover, the smallest upper bound on this quantity is referred to as the sub-Gaussian norm of  $x$  and denoted as  $\|x\|_{\psi_2}$ .

**Definition 8.** A vector-valued random variable  $\mathbf{x} \in \mathbb{R}^p$  is called sub-Gaussian if its unidimensional marginals  $\langle \mathbf{x}, \mathbf{v} \rangle$  are sub-Gaussian for all  $\mathbf{v} \in S^{p-1}$ . Moreover, its sub-Gaussian norm is defined as follows

$$\|X\|_{\psi_2} := \sup_{\mathbf{v} \in S^{p-1}} \|\langle \mathbf{x}, \mathbf{v} \rangle\|_{\psi_2}$$

**Lemma 9.** Let  $X \in \mathbb{R}^{p \times n}$  be a matrix whose columns are sampled i.i.d from a standard Gaussian distribution i.e.  $\mathbf{x}_i \sim \mathcal{N}(0, I)$ . Then for any  $\epsilon > 0$ , with probability at least  $1 - \delta$ ,  $X$  satisfies

$$\begin{aligned} \lambda_{\max}(XX^\top) &\leq n + (1 - 2\epsilon)^{-1} \sqrt{cnp + c'n \log \frac{2}{\delta}} \\ \lambda_{\min}(XX^\top) &\geq n - (1 - 2\epsilon)^{-1} \sqrt{cnp + c'n \log \frac{2}{\delta}}, \end{aligned}$$

where  $c = 24e^2 \log \frac{3}{\epsilon}$  and  $c' = 24e^2$ .

**Theorem 10.** Let  $X \in \mathbb{R}^{p \times n}$  be a matrix whose columns are sampled i.i.d from a standard Gaussian distribution i.e.  $\mathbf{x}_i \sim \mathcal{N}(0, I)$ . Then for any  $k > 0$ , with probability at least  $1 - \delta$ , the matrix  $X$  satisfies the SSC and SSS properties with constants

$$\begin{aligned} \Lambda_k &\leq k \left( 1 + 3e \sqrt{6 \log \frac{en}{k}} \right) + \mathcal{O} \left( \sqrt{np + n \log \frac{1}{\delta}} \right) \\ \lambda_k &\geq n - (n - k) \left( 1 + 3e \sqrt{6 \log \frac{en}{n - k}} \right) - \Omega \left( \sqrt{np + n \log \frac{1}{\delta}} \right). \end{aligned}$$

**Lemma 11.** Let  $X \in \mathbb{R}^{p \times n}$  be a matrix with columns sampled from some sub-Gaussian distribution with sub-Gaussian norm  $K$  and covariance  $\Sigma$ . Then, for any  $\delta > 0$ , with probability at least  $1 - \delta$ , each of the following statements holds true:

$$\begin{aligned} \lambda_{\max}(XX^\top) &\leq \lambda_{\max}(\Sigma) \cdot n + C_K \cdot \sqrt{pn} + t\sqrt{n} \\ \lambda_{\min}(XX^\top) &\geq \lambda_{\min}(\Sigma) \cdot n - C_K \cdot \sqrt{pn} - t\sqrt{n}, \end{aligned}$$

where  $t = \sqrt{\frac{1}{c_K} \log \frac{2}{\delta}}$ , and  $c_K, C_K$  are absolute constants that depend only on the sub-Gaussian norm  $K$  of the distribution.

## B Convergence Proofs for CRR

**Theorem 4.** Let  $x_i \in \mathbb{R}^d$ ,  $1 \leq i \leq n$  be generated i.i.d. from a Gaussian distribution, let  $y_i$ 's be generated using (5) for a fixed  $\mathbf{w}^*$ , and let  $\sigma^2$  be the noise variance. Also let the number of corruptions  $k^*$  be s.t.  $2k^* \leq k \leq n/10000$ . Then for any  $\epsilon, \delta > 0$ , with probability at least  $1 - \delta$ , after  $\mathcal{O} \left( \log \frac{\|\mathbf{b}^*\|_2}{\sigma k + \epsilon} + \log \frac{n}{d} \right)$  steps, CRR ensures that  $\|\mathbf{w}^t - \mathbf{w}^*\|_2 \leq \epsilon + \mathcal{O} \left( \frac{\sigma}{\sqrt{\lambda_{\min}(\Sigma)}} \sqrt{\frac{d}{n} \log \frac{nd}{\delta}} \right)$ .

*Proof.* Using Lemma 5, after  $\mathcal{O} \left( \log \frac{\|\mathbf{b}^*\|_2}{\sigma k + \epsilon} \right)$  steps, we get  $\mathbf{b}^t$  s.t.  $\|\boldsymbol{\lambda}^t\| = \|(X^T X)^{-1} X(\mathbf{b}^t - \mathbf{b}^*)\| \leq \frac{90(k^* + \sqrt{nd})}{n} \|\mathbf{b}^t - \mathbf{b}^*\| \leq \frac{90(k^* + \sqrt{nd})}{n} (6\sigma \sqrt{k^* \log n}) \leq \sigma/100$  as long as  $k \leq n/10000$  and  $n \geq d/10000$ .

Now, recall that  $\mathbf{b}_{t+1} = HT_k(\mathbf{b}^* + X^T(\boldsymbol{\lambda}^t - P_X \epsilon) + \epsilon)$ . Now, using Lemma 13 with  $\boldsymbol{\lambda} = \boldsymbol{\lambda}^t - P_X \epsilon$ , we get:

$$\|\boldsymbol{\lambda}^{t+1}\|_2 \leq 0.91 \|\boldsymbol{\lambda}^t\|_2 + 110\sigma \sqrt{\frac{d}{n} \log^2 n},$$

which ensures a linear convergence of the terms  $\|\boldsymbol{\lambda}^t\|_2$  to a value  $\epsilon + \mathcal{O} \left( \sigma \sqrt{\frac{d}{n} \log \frac{nd}{\delta}} \right)$ .  $\square$

**Lemma 5.** For any data matrix  $X$  that satisfies the SSC and SSS properties such that  $\frac{2\Lambda_{k+k^*}}{\lambda_n} < 1$ , CRR, when executed with  $k \geq k^*$ , ensures for any  $\epsilon, \delta > 0$ , with probability at least  $1 - \delta$  (over the random Gaussian noise  $\epsilon$  in the responses – see (3)) that after  $T_0 = \mathcal{O}\left(\log \frac{\|\mathbf{b}^*\|_2}{e_0 + \epsilon}\right)$  steps,  $\|\mathbf{b}^{T_0} - \mathbf{b}^*\|_2 \leq 3e_0 + \epsilon$ , where  $e_0 = \mathcal{O}\left(\sigma \sqrt{(k + k^*) \log \frac{n}{\delta(k + k^*)}}\right)$  for standard Gaussian designs.

*Proof.* We start with the update step in CRR, and use the fact that  $\mathbf{y} = X^\top \mathbf{w}^* + \mathbf{b}^* + \epsilon$  to rewrite the update as

$$\mathbf{b}^{t+1} \leftarrow \text{HT}_k(P_X \mathbf{b}^t + (I - P_X)(X^\top \mathbf{w}^* + \mathbf{b}^* + \epsilon)).$$

Since  $X^\top = P_X X^\top$ , we get, using the notation set up before,

$$\mathbf{b}^{t+1} \leftarrow \text{HT}_k(\mathbf{b}^* + X^\top \boldsymbol{\lambda}^t + \mathbf{g}).$$

Since  $k \geq k^*$ , using the properties of the hard thresholding step gives us

$$\|\mathbf{b}_{I^{t+1}}^{t+1} - (\mathbf{b}_{I^{t+1}}^* + X_{I^{t+1}}^\top \boldsymbol{\lambda}^t + \mathbf{g}_{I^{t+1}})\|_2 \leq \|\mathbf{b}_{I^{t+1}}^* - (\mathbf{b}_{I^{t+1}}^* + X_{I^{t+1}}^\top \boldsymbol{\lambda}^t + \mathbf{g}_{I^{t+1}})\|_2 = \|X_{I^{t+1}}^\top \boldsymbol{\lambda}^t + \mathbf{g}_{I^{t+1}}\|_2.$$

This, upon applying the triangle inequality, gives us

$$\|\mathbf{b}^{t+1} - \mathbf{b}^*\|_2 \leq 2 \|X_{I^{t+1}}^\top \boldsymbol{\lambda}^t + \mathbf{g}_{I^{t+1}}\|_2.$$

Now, using the SSC and SSS properties of  $X$ , we can show that  $\|X_{I^{t+1}}^\top \boldsymbol{\lambda}^t\|_2 = \|X_{I^{t+1}}^\top (X X^\top)^{-1} X_{I^t}(\mathbf{b}^t - \mathbf{b}^*)\|_2 \leq \frac{\Lambda_{k+k^*}}{\lambda_n} \|\mathbf{b}^t - \mathbf{b}^*\|_2$ .

Since  $\epsilon$  is a Gaussian vector, using tail bounds for Chi-squared random variables (for example, see Lemma 20 in [3]), for any set  $S$  of size  $k + k^*$ , we have with probability at least  $1 - \delta$ ,  $\|\epsilon_S\|_2^2 \leq \sigma^2(k + k^*) + 2e\sigma^2 \sqrt{6(k + k^*) \log \frac{1}{\delta}}$ . Taking a union bound over all sets of size  $(k + k^*)$  and  $\binom{n}{k} \leq \left(\frac{en}{k}\right)^k$  gives us, with probability at least  $1 - \delta$ , for all sets  $S$  of size at most  $(k + k^*)$ ,

$$\|\epsilon_S\|_2 \leq \sigma \sqrt{(k + k^*)} \sqrt{1 + 2e \sqrt{6 \log \frac{en}{\delta(k + k^*)}}}$$

Using tail bounds on Gaussian random variables<sup>3</sup>, we can also show that for every  $i$ , with probability at least  $1 - \delta$ , we have  $\|(X\epsilon)_i\|_2 \leq \sigma \|(X^\top)_i\|_2 \sqrt{2 \log \frac{1}{\delta}}$ . Taking a union bound gives us, with the same confidence,  $\|X\epsilon\|_2^2 \leq 2\sigma^2 \|X\|_F^2 \log \frac{d}{\delta} \leq 2\sigma^2 d \Lambda_n \log \frac{d}{\delta}$ . This allows us to bound  $\|\mathbf{g}_{I^{t+1}}\|_2$

$$\begin{aligned} \|\mathbf{g}_{I^{t+1}}\|_2 &= \|\epsilon_{I^{t+1}} - X_{I^{t+1}}^\top (X X^\top)^{-1} X \epsilon\|_2 \\ &\leq \sigma \sqrt{(k + k^*)} \sqrt{1 + 2e \sqrt{6 \log \frac{en}{\delta(k + k^*)}}} + \sigma \frac{\sqrt{\Lambda_{k+k^*} \Lambda_n}}{\lambda_n} \sqrt{2d \log \frac{d}{\delta}} \\ &\leq \underbrace{\sigma \sqrt{(k + k^*)} \sqrt{1 + 2e \sqrt{6 \log \frac{en}{\delta(k + k^*)}}}}_{e_0} \left(1 + \sqrt{\frac{2d}{n} \log \frac{d}{\delta}}\right) \\ &= 1.0003e_0, \end{aligned}$$

where the second last step is true for Gaussian designs and sufficiently large enough  $n$ . Note that  $e_0$  does not depend on the iterates and is thus, a constant. This gives us

$$\|\mathbf{b}^{t+1} - \mathbf{b}^*\|_2 \leq \frac{2\Lambda_{k+k^*}}{\lambda_n} \|\mathbf{b}^t - \mathbf{b}^*\|_2 + 2.0006e_0.$$

For data matrices sampled from Gaussian ensembles, whose SSC and SSS properties will be established later, assuming  $n \geq d \log d$ , we have  $e_0 = \mathcal{O}\left(\sigma \sqrt{(k + k^*) \log \frac{n}{\delta(k + k^*)}}\right)$ . Thus, if  $\frac{2\Lambda_{k+k^*}}{\lambda_n} < 1$ , then in  $T_0 = \mathcal{O}\left(\log \frac{\|\mathbf{b}^*\|_2}{e_0 + \epsilon}\right)$  steps, CRR ensures that  $\|\mathbf{b}^{T_0} - \mathbf{b}^*\|_2 \leq 2.0009e_0 + \epsilon$ .  $\square$

$$\frac{1}{\sqrt{2\pi}} \int_x^\infty e^{-t^2/2} dt \leq \frac{1}{\sqrt{2\pi}} \int_x^\infty \frac{t}{x} e^{-t^2/2} dt = \frac{1}{x\sqrt{2\pi}} e^{-x^2/2}$$

**Lemma 12.** Let  $\lambda_{\min}(\Sigma)$  be the smallest eigenvalue of the covariance matrix of the distribution  $\mathcal{N}(\mathbf{0}, \Sigma)$  that generates the data points. Then at any time instant  $t$ , we have  $\|\mathbf{w}^t - \mathbf{w}^*\|_2 \leq \frac{2}{\sqrt{\lambda_{\min}(\Sigma)}} \left( 2\sigma \sqrt{\frac{d}{n} \log \frac{d}{\delta}} + \|\boldsymbol{\lambda}^t\|_2 \right)$ .

*Proof.* As described in Algorithm 1,  $\mathbf{w}^t = (XX^\top)^{-1}X(\mathbf{y} - \mathbf{b}^t) = \mathbf{w}^* + (XX^\top)^{-1}X(\boldsymbol{\epsilon} + \mathbf{b}^* - \mathbf{b}^t)$ . If we let  $\bar{X} = \Sigma^{-1/2}X$ , we get:

$$\begin{aligned} \|\mathbf{w}^t - \mathbf{w}^*\|_2 &\leq \frac{1}{\sqrt{\lambda_{\min}(XX^\top)}} \|X^\top(\mathbf{w}^t - \mathbf{w}^*)\|_2 \\ &\leq \frac{1}{\sqrt{n\lambda_{\min}(\Sigma) - C_\Sigma\sqrt{n}}} \|X^\top(\mathbf{w}^t - \mathbf{w}^*)\|_2 \\ &= \frac{1}{\sqrt{n\lambda_{\min}(\Sigma) - C_\Sigma\sqrt{n}}} \|X^\top(XX^\top)^{-1}X(\boldsymbol{\epsilon} + \mathbf{b}^* - \mathbf{b}^t)\|_2 \\ &= \frac{1}{\sqrt{n\lambda_{\min}(\Sigma) - C_\Sigma\sqrt{n}}} \|\bar{X}^\top(\bar{X}\bar{X}^\top)^{-1}\bar{X}(\boldsymbol{\epsilon} + \mathbf{b}^* - \mathbf{b}^t)\|_2 \\ &\leq \frac{\sqrt{\Lambda_n}}{\sqrt{n\lambda_{\min}(\Sigma) - C_\Sigma\sqrt{n}}} \|(\bar{X}\bar{X}^\top)^{-1}\bar{X}(\boldsymbol{\epsilon} + \mathbf{b}^* - \mathbf{b}^t)\|_2 \\ &\leq \frac{2}{\sqrt{\lambda_{\min}(\Sigma)}} \left( 2\sigma \sqrt{\frac{d}{n} \log \frac{d}{\delta}} + \|\boldsymbol{\lambda}^t\|_2 \right), \end{aligned}$$

where the second step follows from results on eigenvalue bounds for data matrices drawn from non-spherical Gaussians, where  $C_\Sigma$  is a constant dependent on the subGaussian norm of the distribution. The fourth step is a whitening step executed for sake of convenience alone and can be bypassed. The step uses the fact that even though  $X$  may be sampled from a non-spherical Gaussian  $\mathcal{N}(\mathbf{0}, \Sigma)$ , the quantity  $X^\top(XX^\top)^{-1}X$  is distributed as  $\bar{X}^\top(\bar{X}\bar{X}^\top)^{-1}\bar{X}$  where  $\bar{X}$  is sampled from a spherical Gaussian  $\mathcal{N}(\mathbf{0}, I)$ . The last step assumes  $n \geq \frac{2C_\Sigma}{\lambda_{\min}(\Sigma)}$  and uses the proof technique used in Lemma 5 to get

$$\|(\bar{X}\bar{X}^\top)^{-1}\bar{X}\boldsymbol{\epsilon}\|_2 \leq \sigma \frac{\sqrt{\Lambda_n}}{\lambda_n} \sqrt{2d \log \frac{d}{\delta}} \leq 2\sigma \sqrt{\frac{d}{n} \log \frac{d}{\delta}}. \quad \square$$

**Lemma 6.** Let  $X = [\mathbf{x}_1, \mathbf{x}_2, \dots, \mathbf{x}_n]$  be a data matrix consisting of i.i.d. standard normal vectors i.e  $\mathbf{x}_i \sim \mathcal{N}(\mathbf{0}, I_{d \times d})$ , and  $\boldsymbol{\epsilon} \sim N(0, \sigma^2 \cdot I_{n \times n})$  be standard normal vector drawn independently of  $X$ . For any  $\boldsymbol{\lambda} \in \mathbb{R}^d$  such that  $\|\boldsymbol{\lambda}\|_2 \leq \frac{\sigma}{100}$ , define  $\mathbf{z} = HT_k(X^\top \boldsymbol{\lambda} + \boldsymbol{\epsilon} + \mathbf{b}^*) - \mathbf{b}^*$ , where  $k = 2k^*$  and  $|\text{supp}(\mathbf{b}^*)| \leq k^*$ . Also let  $k^* \leq n/10000$  and  $d \leq n/10000$ . Then, the following holds (w.p.  $\geq 1 - 1/n^5$ ):

$$\|X\mathbf{z}\| \leq .9n\|\boldsymbol{\lambda}\| + 300\sigma\sqrt{d \cdot n} \log^2 n$$

*Proof.* We first decompose  $\|X\mathbf{z}\|_2^2$ , using the Pythagorean theorem, as:

$$\|X\mathbf{z}\|_2^2 \leq \frac{1}{\|\boldsymbol{\lambda}\|_2^2} (\boldsymbol{\lambda}^\top X\mathbf{z})^2 + \max_{\mathbf{v}, \|\mathbf{v}\|_2=1, \mathbf{v}^\top \boldsymbol{\lambda}=0} (\mathbf{v}^\top X\mathbf{z})^2. \quad (7)$$

We now consider the first term above. Let  $\tau_k > 0$  be such that the  $k$  largest elements (in magnitude) of  $\mathbf{b} = X^\top \boldsymbol{\lambda} + \boldsymbol{\epsilon} + \mathbf{b}^*$  are all greater than  $\tau_k$  and the  $(n - k)$  smallest elements (in magnitude) of  $\mathbf{b}$  are all less than  $\tau_k$ .

That is,

$$\begin{aligned} \boldsymbol{\lambda}^\top X\mathbf{z} &= \sum_j (\boldsymbol{\lambda}^\top \mathbf{x}_j) (\mathbb{I} \{ |\mathbf{x}_j^\top \boldsymbol{\lambda} + b_j^* + \epsilon_j| > \tau_k \} (b_j^* + \epsilon_j + \mathbf{x}_j^\top \boldsymbol{\lambda}) - b_j^*) \\ &= \sum_j (\boldsymbol{\lambda}^\top \mathbf{x}_j)^2 \mathbb{I} \{ |\mathbf{x}_j^\top \boldsymbol{\lambda} + b_j^* + \epsilon_j| > \tau_k \} + \sum_j (\boldsymbol{\lambda}^\top \mathbf{x}_j) (\mathbb{I} \{ |\mathbf{x}_j^\top \boldsymbol{\lambda} + b_j^* + \epsilon_j| > \tau_k \} (b_j^* + \epsilon_j) - b_j^*) \\ &\leq 20(k \log n/k + \sqrt{dn \log n}) \|\boldsymbol{\lambda}\|^2 + \sum_j (\boldsymbol{\lambda}^\top \mathbf{x}_j) (\mathbb{I} \{ |\mathbf{x}_j^\top \boldsymbol{\lambda} + b_j^* + \epsilon_j| > \tau_k \} (b_j^* + \epsilon_j) - b_j^*), \end{aligned} \quad (8)$$

where the last inequality follows from Theorem 10 and hold with probability  $\geq 1 - 1/n^d$ .

Now to bound the second term above, our approach is to show that each of the  $j$ -th term is small in expectation and then use tail bounds to obtain the final bound. Unfortunately, as  $\boldsymbol{\lambda}$  and  $\tau_k$  can depend on random variables  $X$  and  $\boldsymbol{\epsilon}$ , we cannot bound expectation as well as apply Hoeffding style tail bounds directly.

Instead, we take the standard approach of using  $\epsilon$ -nets and union bounds. That is, we form  $\gamma_\lambda$ -net over the set  $B := \mathcal{B}_2(\mathbf{0}, \frac{\sigma}{100})$  (i.e. the ball of radius  $\frac{\sigma}{100} \geq \|\lambda\|$  centered at the origin in  $d$ -dimensions) and similarly a unit dimensional  $\gamma_\tau$ -net over  $[\sigma/2\sqrt{\log(n/k)}, 30\sigma\sqrt{\log(n/k)}]$ ; we will provide the justification for selecting the above given range for  $\tau$  below.

Recall that we hard-threshold  $k = 2k^*$  entries of  $X^\top \lambda + \epsilon + \mathbf{b}^*$ . Moreover,  $|\text{supp}(\mathbf{b}^*)| \leq k^*$ . Now, let  $S = \{j \text{ s.t. } |x_j^\top \lambda + \epsilon_j| \geq \tau_k\}$ . Note that  $|S| \geq k - k^*$  as  $\tau_k$  ensures that top- $k$  elements of  $X^\top \lambda + \epsilon + \mathbf{b}^*$  are selected. Similarly, define  $\hat{S} = \{j \text{ s.t. } |x_j^\top \lambda + \epsilon_j| < \tau_k\}$ . Again, note that  $|\hat{S}| \leq n - k + k^*$  as  $\tau_k$  ensures that *only*  $k$  elements of  $X^\top \lambda + \epsilon + \mathbf{b}^*$  are selected. Hence,

$$\frac{1}{|\hat{S}|} \sum_{j \in \hat{S}} (x_j^\top \lambda + \epsilon_j)^2 \leq \tau_k^2 \leq \frac{1}{|S|} \sum_{j \in S} (x_j^\top \lambda + \epsilon_j)^2. \quad (9)$$

Using the fact that  $k \leq n/10000$  and using SSC/SSS bounds with  $d < n/10000$  (apply Theorem 10 part 1 with  $k - k^*$  and part 2 with  $n - k + k^*$ ), we get with probability at least  $1 - \frac{1}{n^6}$ ,  $\tau_k \in [0.5\sigma\sqrt{\log n/k}, 30\sigma\sqrt{\log n/k}]$ . Note that this result holds uniformly for any  $\lambda \in \mathcal{B}_2(\mathbf{0}, \frac{\sigma}{100})$  as it simply uses the SSC/SSS properties of the matrix  $X$ .

Now, let  $\tilde{\lambda}$  and  $\tilde{\tau}$  be the closest point from the  $\gamma_\lambda$ -net to  $\lambda$  and the  $\gamma_\tau$ -net to  $\tau_k$ , respectively. Now,

$$\left| \sum_j \mathbb{I}\{|x_j^\top \lambda + \epsilon_j + b_j^*| \geq \tau_k\} - \mathbb{I}\{|x_j^\top \tilde{\lambda} + \epsilon_j + b_j^*| \geq \tilde{\tau}\} \right| \leq \sum_j \mathbb{I}\{|x_j^\top \tilde{\lambda} + \epsilon_j + b_j^* - \tilde{\tau}| \leq (\gamma_\tau + \|\mathbf{x}_j\| \gamma_\lambda)\}. \quad (10)$$

Now let us denote  $\nu_j = \mathbf{x}_j^\top \tilde{\lambda} + \epsilon_j + b_j^* \sim \mathcal{N}(b_j^*, \|\lambda\|^2 + \sigma^2)$ . Note that  $\nu_j$  are independent of each other (recall that  $\mathbf{b}^*$  is generated independently of  $\mathbf{x}_i$  and  $\lambda$  is a fixed vector). Also, let  $\gamma = \gamma_\tau + \|\mathbf{x}_j\| \gamma_\lambda$ . Recall that since the Gaussian distribution has a density function that always takes values less than unity at every point, for  $g \sim \mathcal{N}(\mu, 1)$ ,  $\Pr(|g - \tau| \leq \zeta) \leq 2\zeta$  for all  $\tau, \mu$  and for all  $\zeta > 0$ . Hence, for a fixed  $\tilde{\lambda}$  and  $\tilde{\tau}$ , we have:

$$\Pr\left(\sum_j \mathbb{I}\{|\nu_j - \tilde{\tau}| \leq \gamma\} \geq 4d\right) = \Pr\left(\sum_j \mathbb{I}\left\{\left|\frac{\nu_j}{\tilde{\sigma}} - \frac{\tilde{\tau}}{\tilde{\sigma}}\right| \leq \frac{\gamma}{\tilde{\sigma}}\right\} \geq 4d\right) \leq \binom{n}{4d} \left(\frac{2\gamma}{\tilde{\sigma}}\right)^{4d} \leq \binom{n}{4d} \left(\frac{2\gamma}{\sigma}\right)^{4d}. \quad (11)$$

In the above  $\tilde{\sigma} = \sqrt{\sigma^2 + \|\lambda\|_2^2} \geq \sigma$ . At this point, we recall that using standard results on covering numbers [9] and by setting  $\gamma_\tau = \mathcal{O}\left(\frac{\sigma}{n^3}\right)$ ,  $\gamma_\lambda = \frac{\sigma}{2000dn^3 \log n}$ , we know that the net on  $\lambda$  values needs at most  $\left(\frac{4\sigma}{100\gamma_\lambda}\right)^d$  elements and the net on  $\tau$  values needs at most  $\frac{2.5\sigma\sqrt{\log(n/k)}}{\gamma_\tau}$  elements. Thus, using a union bound, we have for all  $\tilde{\lambda}$  in the  $\gamma_\lambda$ -net of  $B$  and  $\tilde{\tau} \in \gamma_\tau$ -net of  $[\sigma/2\sqrt{\log(n/k)}, 30\sigma\sqrt{\log(n/k)}]$ :

$$\Pr\left(\sum_j \mathbb{I}\{|\nu_j - \tilde{\tau}| \leq \gamma\} \geq 4d\right) \leq \binom{n}{4d} \left(\frac{2\gamma}{\sigma}\right)^{4d} \cdot \left(\frac{4\sigma}{100\gamma_\lambda}\right)^d \cdot \left(\frac{2.5\sigma\sqrt{\log(n/k)}}{\gamma_\tau}\right) \leq \frac{2\sqrt{\log n}}{n^{5d}}, \quad (12)$$

where the last inequality follows by setting  $\gamma_\tau = \mathcal{O}\left(\frac{\sigma}{n^3}\right)$ ,  $\gamma_\lambda = \frac{\sigma}{2000dn^3 \log n}$ . These bounds were set as such since  $\|\lambda\|_2 \leq \sigma/100$ , and by using standard tail bounds on Chi-squared random variables, with probability at least  $1 - 1/n^d$ , we have  $\max_i \|\mathbf{x}_i\|_2 \leq 20d \log n$ . Using (10) with the above bound, we get that w.p.  $\geq 1 - \frac{1}{n^d}$ :

$$\left| \sum_j \mathbb{I}\{|x_j^\top \lambda + \epsilon_j + b_j^*| \geq \tau_k\} - \mathbb{I}\{|x_j^\top \tilde{\lambda} + \epsilon_j + b_j^*| \geq \tilde{\tau}\} \right| \leq 4d. \quad (13)$$

Also let  $R = \{j, \text{ s.t., } \mathbb{I}\{|x_j^\top \lambda + \epsilon_j + b_j^*| \geq \tau_k\} \neq \mathbb{I}\{|x_j^\top \tilde{\lambda} + \epsilon_j + b_j^*| \geq \tilde{\tau}\}\}$ . Above bound shows that  $|R| \leq 4d$  with high probability.

Now,

$$\begin{aligned} \sum_{j \in R} |\lambda^\top \mathbf{x}_j| |b_j^* + \epsilon_j| &\leq \sum_{j \in R} |\lambda^\top \mathbf{x}_j| (|\lambda^\top \mathbf{x}_j| + \tilde{\tau} + \gamma) \stackrel{\zeta_1}{\leq} \sum_{j \in R} (\lambda^\top \mathbf{x}_j)^2 + \sqrt{|R|}(\tilde{\tau} + \gamma) \sqrt{\sum_{j \in R} (\lambda^\top \mathbf{x}_j)^2} \\ &\stackrel{\zeta_2}{\leq} 20(d \log n/d + \sqrt{dn \log n}) \|\lambda\|^2 + 160\sigma(d + \sqrt{dn}) \log n \cdot \|\lambda\|, \end{aligned} \quad (14)$$

where  $\zeta_1$  follows from the fact that for all  $j \in R$ ,  $|b_j^* + \epsilon_j + \boldsymbol{\lambda}^\top \mathbf{x}_j - \tilde{\tau}| \leq \gamma$  and by using Cauchy-Schwarz inequality.  $\zeta_2$  follows from SSS condition (Theorem 10), as well as bound on  $\tau$  and  $\gamma$  (given above).

Using (8) and (14), we get (w.p.  $\geq 1 - 1/n^d$ ), for any  $\boldsymbol{\lambda} \in \mathcal{B}_2(\mathbf{0}, \frac{\sigma}{100})$ :

$$\begin{aligned} \boldsymbol{\lambda}^\top X\mathbf{z} &\leq 20((k+d)\log n/d + 2\sqrt{dn\log n})\|\boldsymbol{\lambda}\|^2 + 160\sigma(d + \sqrt{dn}) \cdot \log n \cdot \|\boldsymbol{\lambda}\| \\ &\quad + \sum_j (\boldsymbol{\lambda}^\top \mathbf{x}_j) \left( \mathbb{I} \left\{ |\mathbf{x}_j^\top \tilde{\boldsymbol{\lambda}} + b_j^* + \epsilon_j| > \tilde{\tau} \right\} (b_j^* + \epsilon_j) - b_j^* \right). \end{aligned} \quad (15)$$

We now analyze the last term in the above expression:

$$\begin{aligned} \sum_j (\boldsymbol{\lambda}^\top \mathbf{x}_j) \left( \mathbb{I} \left\{ |\mathbf{x}_j^\top \tilde{\boldsymbol{\lambda}} + b_j^* + \epsilon_j| > \tilde{\tau} \right\} (b_j^* + \epsilon_j) - b_j^* \right) &\stackrel{\zeta_1}{\leq} \sum_j (\tilde{\boldsymbol{\lambda}}^\top \mathbf{x}_j) \left( \mathbb{I} \left\{ |\mathbf{x}_j^\top \tilde{\boldsymbol{\lambda}} + b_j^* + \epsilon_j| > \tilde{\tau} \right\} (b_j^* + \epsilon_j) - b_j^* \right) \\ &\quad + \gamma_{\boldsymbol{\lambda}} \sqrt{d} \sqrt{\log n} \left( \sum_j \left| \left( \mathbb{I} \left\{ |\mathbf{x}_j^\top \tilde{\boldsymbol{\lambda}} + b_j^* + \epsilon_j| > \tilde{\tau} \right\} - 1 \right) b_j^* \right| + |\epsilon_j| \right), \\ &\stackrel{\zeta_2}{\leq} \sum_j (\tilde{\boldsymbol{\lambda}}^\top \mathbf{x}_j) \left( \mathbb{I} \left\{ |\mathbf{x}_j^\top \tilde{\boldsymbol{\lambda}} + b_j^* + \epsilon_j| > \tilde{\tau} \right\} (b_j^* + \epsilon_j) - b_j^* \right) + \gamma_{\boldsymbol{\lambda}} \sqrt{d} \sqrt{\log n} \cdot n \cdot \sqrt{d\sigma} \sqrt{\log n} \\ &\stackrel{\zeta_3}{\leq} \sum_j (\tilde{\boldsymbol{\lambda}}^\top \mathbf{x}_j) \left( \mathbb{I} \left\{ |\mathbf{x}_j^\top \tilde{\boldsymbol{\lambda}} + b_j^* + \epsilon_j| > \tilde{\tau} \right\} (b_j^* + \epsilon_j) - b_j^* \right) + \frac{\sigma}{2000n^2}, \end{aligned} \quad (16)$$

where  $(\zeta_1)$  follows by using the fact that  $\|\boldsymbol{\lambda} - \tilde{\boldsymbol{\lambda}}\|_2 \leq \gamma_{\boldsymbol{\lambda}}$  by definition,  $(\zeta_2)$  follows from bounds on  $\epsilon_j$ , and  $(\zeta_3)$  follows from the setting of  $\gamma_{\boldsymbol{\lambda}} = \frac{\sigma}{2000dn^3 \log n}$ .

Now, using a union bound over all the  $(80dn^3 \log n)^d$  elements of the net over  $\boldsymbol{\lambda}$  values and all  $2.5n^3 \sqrt{\log n}$  elements of the net over  $\tau$  values on top of the result in Lemma 13, we have, w.p.  $1 - 1/n^d$ , for all  $\tilde{\boldsymbol{\lambda}} \in \gamma_{\boldsymbol{\lambda}}$ -net of  $B$  and for all  $\tilde{\tau} \in \gamma_{\tau}$ -net of  $[\cdot, 5\sigma \sqrt{\log n/k}, 30\sigma \sqrt{\log n/k}]$ :

$$\begin{aligned} \sum_j (\tilde{\boldsymbol{\lambda}}^\top \mathbf{x}_j) \left( \mathbb{I} \left\{ |\mathbf{x}_j^\top \tilde{\boldsymbol{\lambda}} + b_j^* + \epsilon_j| > \tilde{\tau} \right\} (b_j^* + \epsilon_j) - b_j^* \right) &\leq \left( 0.4n \sqrt{\log \alpha} \exp\left(-\frac{\log \alpha}{33}\right) + 1.62 \frac{n}{\alpha} \log(\alpha) \right) \|\boldsymbol{\lambda}\|_2^2 \\ &\quad + 8\sigma \|\boldsymbol{\lambda}\| \log n \cdot \sqrt{100nd \log n}, \end{aligned} \quad (17)$$

where  $\alpha = n/k$ .

Finally, using (15), (16), and (17), and the fact that  $\alpha = n/(2k^*) \geq 10000$  and  $d \leq n/10000$ , we get with probability at least  $\geq 1 - 1/n^{10}$ :

$$\boldsymbol{\lambda}^\top X\mathbf{z} \leq .8n\|\boldsymbol{\lambda}\|^2 + 200\sigma\sqrt{n \cdot d} \cdot \log^2 n \cdot \|\boldsymbol{\lambda}\|. \quad (18)$$

We now consider the second term from (7). Let  $\mathbf{v}$  be any unit vector such that  $\mathbf{v}^\top \boldsymbol{\lambda} = 0$ . Note that,

$$\mathbf{v}^\top X\mathbf{z} = \tilde{\mathbf{v}}^\top X\mathbf{z} - (\tilde{\mathbf{v}} - \mathbf{v})^\top X\mathbf{z}, \quad (19)$$

where  $\tilde{\mathbf{v}}$  is the closest point to  $\mathbf{v}$  in an  $\nu$ -net over  $S^{d-1}$  such that each point over the net is orthogonal to  $\tilde{\boldsymbol{\lambda}}$ ; recall that  $\tilde{\boldsymbol{\lambda}}$  is the closest point to  $\boldsymbol{\lambda}$  over  $\gamma_{\boldsymbol{\lambda}}$  net over  $B$ .

Now,

$$\tilde{\mathbf{v}}^\top X\mathbf{z} = \sum_j (\tilde{\mathbf{v}}^\top \mathbf{x}_j) (\mathbb{I} \left\{ |\boldsymbol{\lambda}^\top \mathbf{x}_j + b_j^* + \epsilon_j| \geq \tau_k \right\} (b_j^* + \epsilon_j) - b_j^*), \quad (20)$$

$$\begin{aligned} &= \sum_j (\tilde{\mathbf{v}}^\top \mathbf{x}_j) (\mathbb{I} \left\{ |\tilde{\boldsymbol{\lambda}}^\top \mathbf{x}_j + b_j^* + \epsilon_j| \geq \tilde{\tau} \right\} (b_j^* + \epsilon_j) - b_j^*) \\ &\quad + \sum_j (\tilde{\mathbf{v}}^\top \mathbf{x}_j) (\mathbb{I} \left\{ |\boldsymbol{\lambda}^\top \mathbf{x}_j + b_j^* + \epsilon_j| \geq \tau_k \right\} - \mathbb{I} \left\{ |\tilde{\boldsymbol{\lambda}}^\top \mathbf{x}_j + b_j^* + \epsilon_j| \geq \tilde{\tau} \right\}) (b_j^* + \epsilon_j). \end{aligned} \quad (21)$$

Now, using the fact that,

$$\left| \mathbb{I} \left\{ |\boldsymbol{\lambda}^\top \mathbf{x}_j + b_j^* + \epsilon_j| \geq \tau_k \right\} - \mathbb{I} \left\{ |\tilde{\boldsymbol{\lambda}}^\top \mathbf{x}_j + b_j^* + \epsilon_j| \geq \tilde{\tau} \right\} \right| \leq \mathbb{I} \left\{ |\tilde{\boldsymbol{\lambda}}^\top \mathbf{x}_j + b_j^* + \epsilon_j - \tilde{\tau}| \leq \gamma_\tau + \|\mathbf{x}_j\| \gamma_\lambda \right\},$$

as well as using (13), we get (w.p.  $\geq 1 - 1/n^d$ ):

$$\begin{aligned} \sum_j (\tilde{\mathbf{v}}^\top \mathbf{x}_j) (\mathbb{I} \left\{ |\boldsymbol{\lambda}^\top \mathbf{x}_j + b_j^* + \epsilon_j| \geq \tau_k \right\} - \mathbb{I} \left\{ |\tilde{\boldsymbol{\lambda}}^\top \mathbf{x}_j + b_j^* + \epsilon_j| \geq \tilde{\tau} \right\}) (b_j^* + \epsilon_j) &\leq \sum_{j \in R} |\tilde{\mathbf{v}}^\top \mathbf{x}_j| (|\tilde{\boldsymbol{\lambda}}^\top \mathbf{x}_j| + \tilde{\tau} + \gamma_\tau + \|\mathbf{x}_j\| \gamma_\lambda), \\ &\stackrel{\zeta_1}{\leq} 2\|\boldsymbol{\lambda}\| \sum_{j \in R} (\tilde{\mathbf{v}}^\top \mathbf{x}_j)^2 + 2 \frac{1}{\|\boldsymbol{\lambda}\|} \sum_{j \in R} (\tilde{\boldsymbol{\lambda}}^\top \mathbf{x}_j)^2 + 30\sigma \log n \sum_{j \in R} |\tilde{\mathbf{v}}^\top \mathbf{x}_j|, \\ &\stackrel{\zeta_2}{\leq} (d + \sqrt{dn})\sigma + 100\sigma d \log n, \end{aligned} \quad (22)$$

where  $R = \left\{ j, \text{ s.t., } \sum_j \mathbb{I} \left\{ |\mathbf{x}_j^\top \boldsymbol{\lambda} + \epsilon_j + b_j^*| \geq \tau_k \right\} \neq \mathbb{I} \left\{ |\mathbf{x}_j^\top \tilde{\boldsymbol{\lambda}} + \epsilon_j + b_j^*| \geq \tilde{\tau} \right\} \right\}$ .  $\zeta_1$  follows from  $\tilde{\tau} \leq 30\sigma\sqrt{\log n}$ .  $\zeta_2$  follows from Theorem 10 along with bound on  $|R| \leq 4d$  obtained using (13).

Now consider the first term of (21). Using an argument similar to the one used in Lemma 13, we get (w.p.  $\geq 1 - \exp(-n/10)$ ):

$$|(\tilde{\mathbf{v}}^\top \mathbf{x}_j) (\mathbb{I} \left\{ |\tilde{\boldsymbol{\lambda}}^\top \mathbf{x}_j + b_j^* + \epsilon_j| \geq \tilde{\tau} \right\}) (b_j^* + \epsilon_j) - b_j^*)| \leq 8\sigma \log n. \quad (23)$$

Now since  $\mathbf{v} \perp \boldsymbol{\lambda}$  and  $\mathbf{x}_j$  is a standard multivariate Gaussian random variable,  $\boldsymbol{\lambda}^\top \mathbf{x}_j$  and  $\mathbf{v}^\top \mathbf{x}_j$  are independent random variables. Moreover  $\mathbb{E} [\mathbf{v}^\top \mathbf{x}_j] = 0$ . Thus we have

$$\mathbb{E} \left[ \sum_j (\mathbf{v}^\top \mathbf{x}_j) (\mathbb{I} \left\{ |\boldsymbol{\lambda}^\top \mathbf{x}_j + b_j^* + \epsilon_j| \geq \tilde{\tau} \right\}) (b_j^* + \epsilon_j) - b_j^*) \right] = 0$$

Using simple manipulations, we can then show

$$\mathbb{E} \left[ \sum_j (\tilde{\mathbf{v}}^\top \mathbf{x}_j) (\mathbb{I} \left\{ |\tilde{\boldsymbol{\lambda}}^\top \mathbf{x}_j + b_j^* + \epsilon_j| \geq \tilde{\tau} \right\}) (b_j^* + \epsilon_j) - b_j^*) \right] \leq n(\gamma_\tau + \gamma_\lambda \cdot d \log n),$$

where the right hand side is vanishingly small since we set  $\gamma_\tau$  and  $\gamma_\lambda$  to values of the order of  $n^{-3}$ . Even the above can be avoided and the right hand side made absolutely zero by simply expanding the  $\nu$ -net over  $\mathbf{v}$  vectors so that for every pair of  $(\mathbf{v}, \boldsymbol{\lambda})$  that is orthogonal, we are able to find a pair  $(\tilde{\mathbf{v}}, \tilde{\boldsymbol{\lambda}})$  that are not only in close proximity to the original pair but we also have  $\tilde{\mathbf{v}} \perp \tilde{\boldsymbol{\lambda}}$ . This would require a quadratic increase in the number of points in the net which can only increase the constants in the expressions by a small quantity.

Thereafter, using the Hoeffding's inequality with union bound as well (19), (21), and (23), we get w.p.  $\geq 1 - 1/n^{d-1}$ , for all  $\boldsymbol{\lambda}$  and for all  $\mathbf{v} \in S^{d-1}$  s.t.  $\mathbf{v} \perp \boldsymbol{\lambda}$ :

$$|\mathbf{v}^\top X \mathbf{z}| \leq 100\sigma(d + \sqrt{d \cdot n}) \log^2 n. \quad (24)$$

The result now follows by combining (7), (18), and (24) and using  $\sqrt{a+b} \leq \sqrt{a} + \sqrt{b}$ .  $\square$

**Lemma 13.** Let  $\mathbf{x}_j \sim \mathcal{N}(0, I) \in \mathbb{R}^d$  for all  $1 \leq j \leq n$  and  $\epsilon_j \sim \mathcal{N}(0, \sigma^2)$ . Let  $b^*$  be  $k^*$  sparse and  $k = 2k^*$ . Let  $d < n/10000$ ,  $k < n/10000$  and  $\alpha = n/k$ . Let  $\boldsymbol{\lambda} \in \mathbb{R}^d$  be a fixed vector with  $\|\boldsymbol{\lambda}\| \leq \sigma/100$  and  $\tau \in [.5\sigma \log(n/k), 2\sigma \log(n/k)]$  be a fixed constant. Then, the following holds (w.p.  $\geq 1 - \delta - \exp(-n/10)$ ):

$$\begin{aligned} \sum_j (\boldsymbol{\lambda}^\top \mathbf{x}_j) (\mathbb{I} \left\{ |\mathbf{x}_j^\top \boldsymbol{\lambda} + b_j^* + \epsilon_j| > \tau \right\}) (b_j^* + \epsilon_j) - b_j^*) &\leq \left( 0.4n\sqrt{\log \alpha} \exp\left(-\frac{\log \alpha}{33}\right) + 1.62 \frac{n}{\alpha} \log(\alpha) \right) \|\boldsymbol{\lambda}\|_2^2 \\ &\quad + 8\sigma \|\boldsymbol{\lambda}\| \log n \sqrt{n \log \frac{n}{\delta}}. \end{aligned}$$

*Proof.* Let us define  $\mathbf{x}_j^\top \boldsymbol{\lambda} := h_j$ ,  $a_j = b_j^* + \epsilon_j$ . We note that  $h_j \sim N(0, \|\boldsymbol{\lambda}\|_2^2)$  and  $a_j \sim N(b_j^*, \sigma^2)$ . Then, we are interested in:

$$\sum_j (\boldsymbol{\lambda}^\top \mathbf{x}_j) (\mathbb{I} \left\{ |\mathbf{x}_j^\top \boldsymbol{\lambda} + b_j^* + \epsilon_j| > \tau \right\}) (b_j^* + \epsilon_j) - b_j^*) = \sum_j r_j, \quad (25)$$

where

$$r_j = \mathbb{I}\{|h_j + a_j| > \tau\} h_j a_j - h_j b_j^*.$$

Note that  $\mathbb{E} \left[ \sum_j h_j b_j^* \right] = 0$  since  $b_j^*$  is independent of  $h_j$  and  $\lambda$  is fixed. Hence,

$$\mathbb{E} \left[ \sum_j r_j \right] = \mathbb{E} \left[ \sum_j \mathbb{I}\{|h_j + a_j| > \tau\} h_j a_j \right]. \quad (26)$$

Now, using distribution of  $h_j$  and  $a_j$ , we have:

$$\begin{aligned} \mathbb{E} [\mathbb{I}\{|h_j + a_j| > \tau\} h_j a_j | a_j] &= \frac{1}{\sqrt{2\pi} \|\lambda\|_2} \int_{-\infty}^{-\tau-a_j} a_j h_j \exp\left(-\frac{h_j^2}{2\|\lambda\|_2^2}\right) dh_j + \frac{1}{\sqrt{2\pi} \|\lambda\|_2} \int_{\tau-a_j}^{\infty} a_j h_j \exp\left(-\frac{h_j^2}{2\|\lambda\|_2^2}\right) dh_j \\ &= \frac{\|\lambda\|_2}{\sqrt{2\pi}} a_j \left( \exp\left(-\frac{(\tau-a_j)^2}{2\|\lambda\|_2^2}\right) - \exp\left(-\frac{(\tau+a_j)^2}{2\|\lambda\|_2^2}\right) \right). \end{aligned}$$

Since  $h_j$  and  $a_j$  are independent  $\mathbb{E} [\mathbb{I}\{|h_j + a_j| > \tau\} h_j a_j] = \mathbb{E}_{a_j} [\mathbb{E}_{h_j} [\mathbb{I}\{|h_j + a_j| > \tau\} h_j a_j | a_j]]$ . Therefore,

$$\begin{aligned} \mathbb{E} [\mathbb{I}\{|h_j + a_j| > \tau\} h_j a_j] &= \frac{\|\lambda\|_2^2}{\sqrt{2\pi} \|\lambda\|_2} \frac{1}{\sqrt{2\pi}\sigma} \int_{-\infty}^{\infty} a_j \exp\left(-\frac{(\tau-a_j)^2}{2\|\lambda\|_2^2}\right) \exp\left(-\frac{(a_j-b_j^*)^2}{2\sigma^2}\right) da_j \\ &\quad - \frac{\|\lambda\|_2^2}{\sqrt{2\pi} \|\lambda\|_2} \frac{1}{\sqrt{2\pi}\sigma} \int_{-\infty}^{\infty} a_j \exp\left(-\frac{(\tau+a_j)^2}{2\|\lambda\|_2^2}\right) \exp\left(-\frac{(a_j-b_j^*)^2}{2\sigma^2}\right) da_j \\ &= \frac{1}{\sqrt{2\pi}} \frac{\|\lambda\|_2^2}{\sqrt{\|\lambda\|_2^2 + \sigma^2}} \exp\left(-\frac{1}{2} \left( \frac{\tau^2}{\|\lambda\|_2^2} + \frac{b_j^{*2}}{\sigma^2} \right)\right) \frac{\frac{\tau}{\|\lambda\|_2^2} + \frac{b_j^*}{\sigma^2}}{\frac{1}{\|\lambda\|_2^2} + \frac{1}{\sigma^2}} \exp\left(\frac{1}{2} \frac{\left(\frac{\tau}{\|\lambda\|_2^2} + \frac{b_j^*}{\sigma^2}\right)^2}{\frac{1}{\|\lambda\|_2^2} + \frac{1}{\sigma^2}}\right) \\ &\quad + \frac{1}{\sqrt{2\pi}} \frac{\|\lambda\|_2^2}{\sqrt{\|\lambda\|_2^2 + \sigma^2}} \exp\left(-\frac{1}{2} \left( \frac{\tau^2}{\|\lambda\|_2^2} + \frac{b_j^{*2}}{\sigma^2} \right)\right) \frac{\frac{\tau}{\|\lambda\|_2^2} - \frac{b_j^*}{\sigma^2}}{\frac{1}{\|\lambda\|_2^2} + \frac{1}{\sigma^2}} \exp\left(\frac{1}{2} \frac{\left(\frac{-\tau}{\|\lambda\|_2^2} + \frac{b_j^*}{\sigma^2}\right)^2}{\frac{1}{\|\lambda\|_2^2} + \frac{1}{\sigma^2}}\right) \\ &\leq 2 \frac{\|\lambda\|_2^2}{\sqrt{2\pi}} \frac{\tau + \frac{|b_j^*| \|\lambda\|_2^2}{\sigma^2}}{\sigma} \exp\left(\frac{-1}{2} \frac{(|b_j^*| - \tau)^2}{\sigma^2 + \|\lambda\|_2^2}\right), \end{aligned} \quad (27)$$

where the above inequalities follow from straightforward calculations.

Note that  $\|\lambda\|_2^2 \leq \frac{\sigma^2}{10^4}$ . Let  $\alpha := \frac{n}{k}$ . Now, consider the following three cases for a fixed  $\tau \in (\frac{1}{2}\sqrt{\log(\alpha)}, 2\sqrt{\log(\alpha)})$ :

- $|b_j^*| \leq \tau/2$

$$\mathbb{E} [r_j] \leq \|\lambda\|_2^2 \frac{2}{\sqrt{2\pi}} \frac{\tau + \frac{\tau}{2 \cdot 10^4}}{\sigma} \exp\left(\frac{-1}{2.02} \frac{(|b_j^*| - \tau)^2}{\sigma^2}\right) \stackrel{\zeta_1}{\leq} \|\lambda\|_2^2 0.8 \frac{\tau}{\sigma} \exp\left(\frac{-1}{8.08} \frac{\tau^2}{\sigma^2}\right)$$

where  $\zeta_1$  follows from using the fact that  $|b_j^*| \leq \tau/2$ .

- $\tau/2 \leq |b_j^*| \leq 2\tau$

$$\mathbb{E} [r_j] \leq \|\lambda\|_2^2 \frac{2}{\sqrt{2\pi}} \frac{\tau + \frac{2\tau}{10^4}}{\sigma} \exp\left(\frac{-1}{2.02} \frac{(|b_j^*| - \tau)^2}{\sigma^2}\right) \stackrel{\zeta_1}{\leq} \|\lambda\|_2^2 0.8 \frac{\tau}{\sigma}$$

where  $\zeta_1$  follows from using  $\exp\left(\frac{-1}{2.02} \frac{(|b_j^*| - \tau)^2}{\sigma^2}\right) \leq 1$ .

- $|b_j^*| \geq 2\tau$

$$\mathbb{E} [r_j] \leq \|\lambda\|_2^2 \frac{2}{\sqrt{2\pi}} \frac{0.5001|b_j^*|}{\sigma} \exp\left(\frac{-1}{2.02} \frac{(|b_j^*| - \tau)^2}{\sigma^2}\right) \stackrel{\zeta_1}{\leq} \|\lambda\|_2^2 0.4 \frac{|b_j^*|}{\sigma} \exp\left(\frac{-1}{8.08} \frac{b_j^{*2}}{\sigma^2}\right)$$

where  $\zeta_1$  follows from using  $|b_j^*| \geq 2\tau$ .

Recall that  $\mathbf{b}^*$  has at most  $k^*$  non-zeros, hence at most  $k^*$  elements can belong to case 2 and 3 described above. Combining the above given cases, we have:

$$\begin{aligned}
\mathbb{E} \left[ \sum_j r_j \right] &\leq \left( (n - k^*) \max_{\beta \geq \frac{2\tau}{\sigma}} \left[ 0.4\beta \exp \left( \frac{-\beta^2}{8.08} \right), 0.8 \frac{\tau}{\sigma} \exp \left( \frac{-1}{8.08} \frac{\tau^2}{\sigma^2} \right) \right] + 0.8 \frac{\tau}{\sigma} \cdot k^* \right) \|\boldsymbol{\lambda}\|_2^2 \\
&\stackrel{\zeta_1}{\leq} \left( (n - k^*) \max_{\beta \geq \frac{2\tau}{\sigma}} \left[ 0.4\beta \exp \left( \frac{-\beta^2}{8.08} \right), 0.8 \frac{\tau}{\sigma} \exp \left( \frac{-1}{8.08} \frac{\tau^2}{\sigma^2} \right) \right] + 1.62 \frac{n}{\alpha} \log(\alpha) \right) \|\boldsymbol{\lambda}\|_2^2 \\
&\stackrel{\zeta_2}{\leq} \left( 0.4n\sqrt{\log \alpha} \exp \left( -\frac{\log \alpha}{33} \right) + 1.62 \frac{n}{\alpha} \log(\alpha) \right) \|\boldsymbol{\lambda}\|_2^2,
\end{aligned} \tag{28}$$

where  $\zeta_1$  follows from the fact that  $\tau \leq 30\sigma\sqrt{\log(\alpha)}$ .  $\zeta_2$  follows from maximizing  $x \exp \left( -\frac{x^2}{8.08} \right)$  in the interval  $(0.5\sqrt{\log(\alpha)}, 2\sqrt{\log(\alpha)})$  for  $\tau$  and  $(\sqrt{\log(\alpha)}, \infty)$  for  $\beta$ .

Above given equation bounds the expected values of  $\sum_j r_j$ . We now bound the deviation of  $\sum_j r_j$  from its expected value. For this, we first consider  $r_j = \mathbb{I} \{ |h_j + a_j| > \tau \} h_j a_j - h_j b_j^*$ . Here, we consider two cases:

1.  $|h_j + a_j| > \tau$ : in this case,  $r_j = h_j \epsilon_j$ . Moreover, w.p.  $\geq 1 - \exp(-n/10)$ ,  $|h_j| \leq 2\|\boldsymbol{\lambda}\|\sqrt{\log n}$ , and  $|\epsilon_j| \leq 2\sigma\sqrt{\log n}$ . Hence,  $|r_j| \leq 4\|\boldsymbol{\lambda}\|\sigma \log n$ .
2.  $|h_j + a_j| \leq \tau$ : in this case,  $|b_j^*| \leq \tau + |h_j| + |\epsilon_j| \leq \tau + 2(\|\boldsymbol{\lambda}\| + \sigma)\sqrt{\log n}$ . Moreover,  $r_j = -h_j b_j^*$ , i.e.,  $|r_j| \leq 8\sigma\|\boldsymbol{\lambda}\| \log n$ .

Hence, using Hoeffding's bound, we get (w.p.  $\geq 1 - \delta - \exp(-n/10)$ ):

$$\left| \sum_j r_j - \mathbb{E}[r_j] \right| \leq 8\sigma\|\boldsymbol{\lambda}\| \log n \sqrt{n \log \left( \frac{2}{\delta} \right)}.$$

The result now follows by combining the above observation with (28). □
